# Supplementary material for: Adapting the Quality Maternal and Newborn Care (QMNC) Framework to evaluate models of antenatal care: A pilot study
Source: PLOS journal article supplement (doi:10.1371/journal.pone.0200640), 2018-08-14
Supplement: S1 (10.1371/journal.pone.0200640.s001) [file journal.pone.0200640.s001]

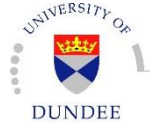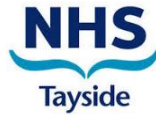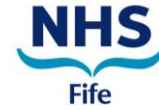

## Topic guide for focus groups (service users and service providers)

These questions \* relate to the model of care with which you are most familiar

- Did the model of care cover all the necessary bases – e.g. health promotion, screening, care planning, managing complications?
  - E.g., does / did it provide the necessary care for woman whatever their risk level?
- What do you feel about the organisation of care?
  - E.g., is / was it accessible, of good quality, and adequately resourced?
- Do you feel that women are shown respect within this model of care?
  - E.g., is / was care tailored to the needs of individuals?
- Is / was the care based on a promoting normality and strengthening women's capabilities?
  - E.g., does / did it follow expectant management, intervening only when necessary?
- Do / did care providers demonstrate both knowledge and skills, and an awareness of how to use these most effectively?
  - E.g., are roles and responsibilities based on need? On resources?

*\* questions are based on the QMNC Framework.*

*Present tense to be used for pregnant women and service providers; past tense to be used for postnatal women.*
